# Supplementary material for: Mulberry Fruit Extract Promotes Serum HDL-Cholesterol Levels and Suppresses Hepatic microRNA-33 Expression in Rats Fed High Cholesterol/Cholic Acid Diet
Source: PubMed Central journal article supplement (PMC7284868; doi:10.3390/nu12051499), 2020-05-21
Supplement: nutrients-12-01499-s001.pdf [file nutrients-12-01499-s001.pdf]

**Table S1.** The compositions of experimental diets.

| Component                 | (g/ kg diet) |              |              |
|---------------------------|--------------|--------------|--------------|
|                           | NOR          | HC           | HM           |
| Corn starch               | 150.0        | 150.0        | 150.0        |
| Casein                    | 200.0        | 200.0        | 200.0        |
| Sucrose                   | 500.0        | 485.0        | 481.0        |
| Corn oil                  | 50.0         | 50.0         | 50.0         |
| Cellulose                 | 50.0         | 50.0         | 50.0         |
| Mineral mix <sup>1)</sup> | 35.0         | 35.0         | 35.0         |
| Vitamin mix <sup>2)</sup> | 10.0         | 10.0         | 10.0         |
| DL-Methionine             | 3.0          | 3.0          | 3.0          |
| Choline bitartrate        | 2.0          | 2.0          | 2.0          |
| Cholesterol               | 0.0          | 10.0         | 10.0         |
| Cholic acid               | 0.0          | 5.0          | 5.0          |
| Mulberry fruit extract    | 0.0          | 0.0          | 4.0          |
| <b>Total</b>              | <b>1,000</b> | <b>1,000</b> | <b>1,000</b> |
| Total calorie (kcal)      | 3774         | 3714         | 3698         |
| Carbohydrates (% as kcal) | 67.3         | 66.8         | 66.6         |
| Protein (% as kcal)       | 19.0         | 19.3         | 19.4         |
| Fat (% as kcal)           | 11.9         | 12.1         | 12.2         |

<sup>1)</sup> AIN-76 Mineral mix (mg/kg diet); <sup>2)</sup> AIN-76 Vitamin mix (mg/kg diet). NOR: normal diet, HC: high cholesterol/**cholic acid** diet containing 1% cholesterol and 0.5% cholic acid, HM; HC + 0.4% high hydrostatic pressure mulberry fruit. This experimental diet was formulated based on the AIN -76 diet composition.

**Table S2.** Primers used for quantitative real-time polymerase chain reaction (qRT-PCR).

| Gene           | GeneBank no.   | Forward sequence (5'-3') | Reverse sequence (5'-3') | Product size (bp) |
|----------------|----------------|--------------------------|--------------------------|-------------------|
| Abca1          | NM_178095      | CCCAATCCCAAACACTCCTT     | TCTTCATCGTCCAGTTCCCA     | 107               |
| Abcb11         | NM_031760.1    | CACTGGCCTTCTGGTATGGT     | GCTTGTAGCCGTCTCCTGAC     | 225               |
| Abcg5          | NM_053754      | ATGAGTGAGCTGCCCTTCT      | CGCTGAAGGACACATTCAGG     | 142               |
| Abcg8          | NM_130414      | GAGAACTTTGTCCCGCCTGG     | AGATAGGGGTGCCAGACGTC     | 122               |
| ApoA-1         | NM_012738      | CTGGGTTCAACTGTTGGTCCG    | GGGCTGCATCTTCTGTTTCA     | 147               |
| Atp8b1         | NM_001106140.1 | TACGGTCATGGTGGACAGAA     | ATGCTACCTTCTGGGGTCCT     | 237               |
| $\beta$ -actin | NM_031144      | GGCACCACACTTTCTACAAT     | AGGTCTCAAACATGATCTGG     | 123               |
| Cyp7a1         | NM_012942      | TGTTCTGTGTTCACTTTCTG     | ACTCGGTAACAGAAGGCATA     | 126               |
| Fxr            | NM_021745.1    | CGCCGTGTACAAGTGTAAAGA    | TTCACTGTCTGATCCGCATG     | 109               |
| Lcat           | NM_017024      | TAACAATGGGTATGTGCGGG     | GCCAAGGCTGTGTCCAATAA     | 163               |
| Lxr- $\alpha$  | NM_031627      | GACTTCGAGTCACGCCTTGG     | GTCCCTCCCTGCTCAGCTGTA    | 161               |
| Shp            | NM_057133.1    | CCTTGGATGTCCTAGGCAAG     | CACCACTGTTGGGTTCTCT      | 213               |
| Sreb2          | NM_001033694.1 | GACAGGATGAAGCCACCATT     | GGCAAGAGACCTGAGTCCTG     | 214               |

Abca1, ATP-binding cassette, subfamily A member 1; Abcb11, ATP binding cassette subfamily B member 11; Abcg5, ATP-binding cassette subfamily G member 5; Abcg8, ATP-binding cassette subfamily G member 8; ApoA-1, apolipoprotein A1; Atp8b1, ATPase phospholipid transporting 8B1; Cyp7a1, cholesterol 7 alpha-hydroxylase; Fxr, farnesoid x receptor; Lcat, lecithin cholesterol acyltransferase; Lxr- $\alpha$ , liver X receptor  $\alpha$ ; Shp, small heterodimer partner; Sreb2, sterol regulatory element binding transcription factor 2

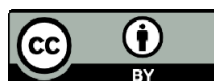

© 2020 by the authors. Submitted for possible open access publication under the terms and conditions of the Creative Commons Attribution (CC BY) license (<http://creativecommons.org/licenses/by/4.0/>).
